# Supplementary material for: Ultrathin Cu-MOF@δ-MnO2 nanosheets for aqueous electrolyte-based high-voltage electrochemical capacitors
Source: Royal Society of Chemistry journal article supplement (doi:10.1039/c8ta05976d), 2018-01-01
Supplement: c8ta05976d1.pdf [file c8ta05976d1.pdf]

## Supporting information

**Ultrathin Cu-MOF@ $\delta$ -MnO<sub>2</sub> Nanosheets for Aqueous Electrolyte-based High-Voltage Electrochemical Capacitors**

## **Electrochemical measurement**

**Traditional three-electrode system:** The electrochemical performance was determined by a CHI 660E instrument in a traditional three-electrode system. A Hg/HgO electrode and platinum electrode were chosen as the reference and counter electrode, respectively. The electrolyte was a 1.0 M Na<sub>2</sub>SO<sub>4</sub> aqueous solution. The working electrode materials were prepared by grinding the mixture of active materials, acetylene black, and PTFE with a weight ratio of 80:15:5, and coating the mixture on a 1 cm × 5 cm nickel foam. The additive was a certain amount of isopropyl alcohol when grinding, and the painted size was approximately 1 cm × 1 cm. In addition, the nickel foam with the coated activated materials was pressed to a thin foil at a pressure of 10.0 MPa.

**Asymmetrical supercapacitor system:** The electrochemical performance was conducted by a CHI 660E instrument in a traditional asymmetrical supercapacitor system. Aqueous electrochemical energy storage devices were assembled by employing the ultrathin Cu-MOF@ $\delta$ -MnO<sub>2</sub> nanosheets as a positive electrode and activated carbon as a negative electrode. The electrolyte was a 1.0 M Na<sub>2</sub>SO<sub>4</sub> aqueous solution. The activated carbon electrode was prepared by grinding a mixture of activated

carbon, acetylene black, and PTFE with a weight ratio of 80:15:5, and coating the mixture on a 1 cm × 5 cm nickel foam. The additive was a certain amount of isopropyl alcohol during grinding, and the painted size was approximately 1 cm × 1 cm. In addition, the nickel foam with the coat of activated materials was pressed to a thin foil at a pressure of 10.0 MPa.

### **Characterizations**

The morphology of as-prepared samples was captured by a Supra 55 SEM at an acceleration voltage of 5.0 kV. The phase analysis of the samples was performed by a Bruker AXS D8 advanced XRD with Cu *Ka* radiation of 40 kV. Fourier transform infrared (FTIR) transmission spectra were obtained on a BRUKER-EQUINOX-55IR spectrophotometer. The surface chemical species of the samples were examined using a Perkin-Elmer PHI-5702 multifunctional XPS with Al<sub>15</sub>K $\alpha$  radiation of 1486.6 eV as the excitation source. TEM images were observed on the JEM-2100 instrument microscopy at an acceleration voltage of 200 kV. Scanning transmission electron microscopy (STEM) images, HRTEM images, SAED images and EDS mapping were captured on a Tecnai G2 F30 transmission electron microscopy at an acceleration voltage of 300 kV. Nitrogen adsorption-desorption measurements were performed on a Gemini VII 2390 analyzer at 77 K using the volumetric method. The specific

surface area was obtained from the N<sub>2</sub> adsorption-desorption isotherms and was calculated by the BET method. All electrochemical performances were carried out by CHI 660E instrument.

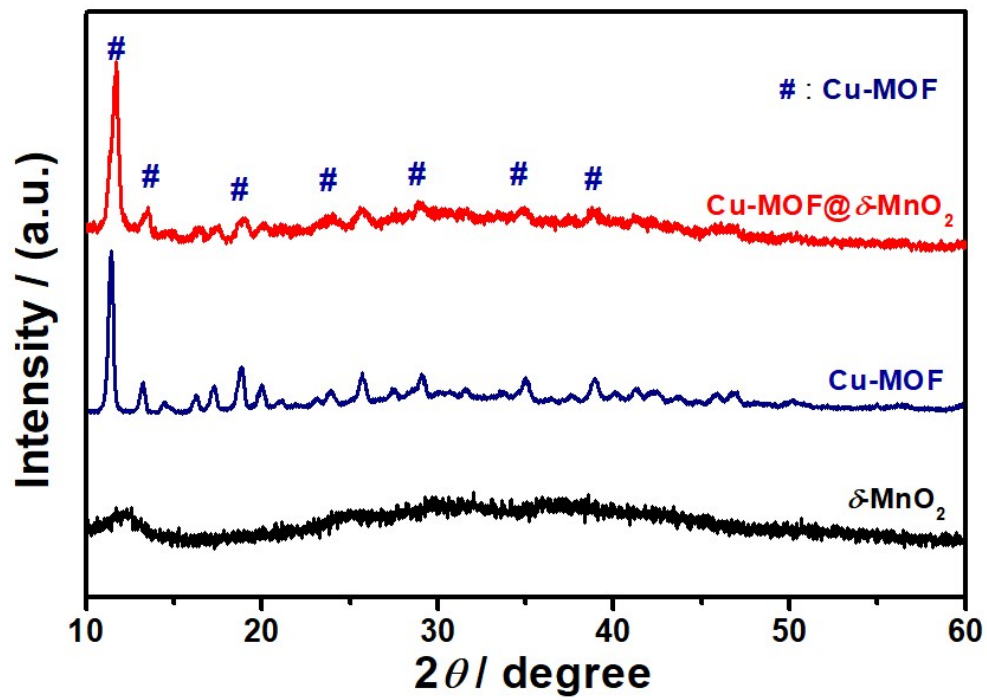

**Figure S1.** XRD patterns of Cu-MOF@ $\delta$ -MnO<sub>2</sub>, Cu-MOF and  $\delta$ -MnO<sub>2</sub>. (“#” marks show the obvious diffraction peaks of Cu-MOF)

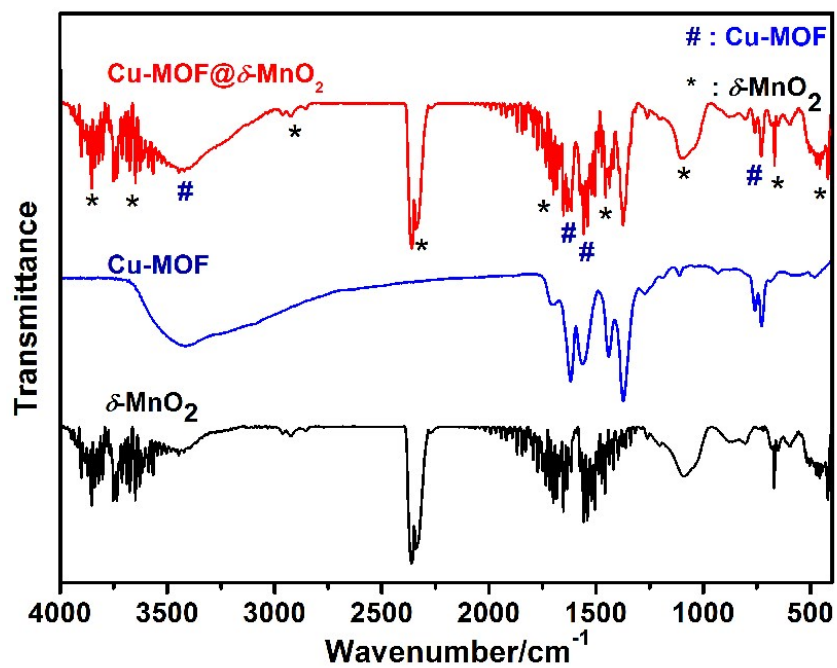

**Figure S2.** Fourier transform infrared spectroscopy (FT-IR) spectra of Cu-MOF@ $\delta$ -MnO<sub>2</sub>, Cu-MOF and  $\delta$ -MnO<sub>2</sub>.

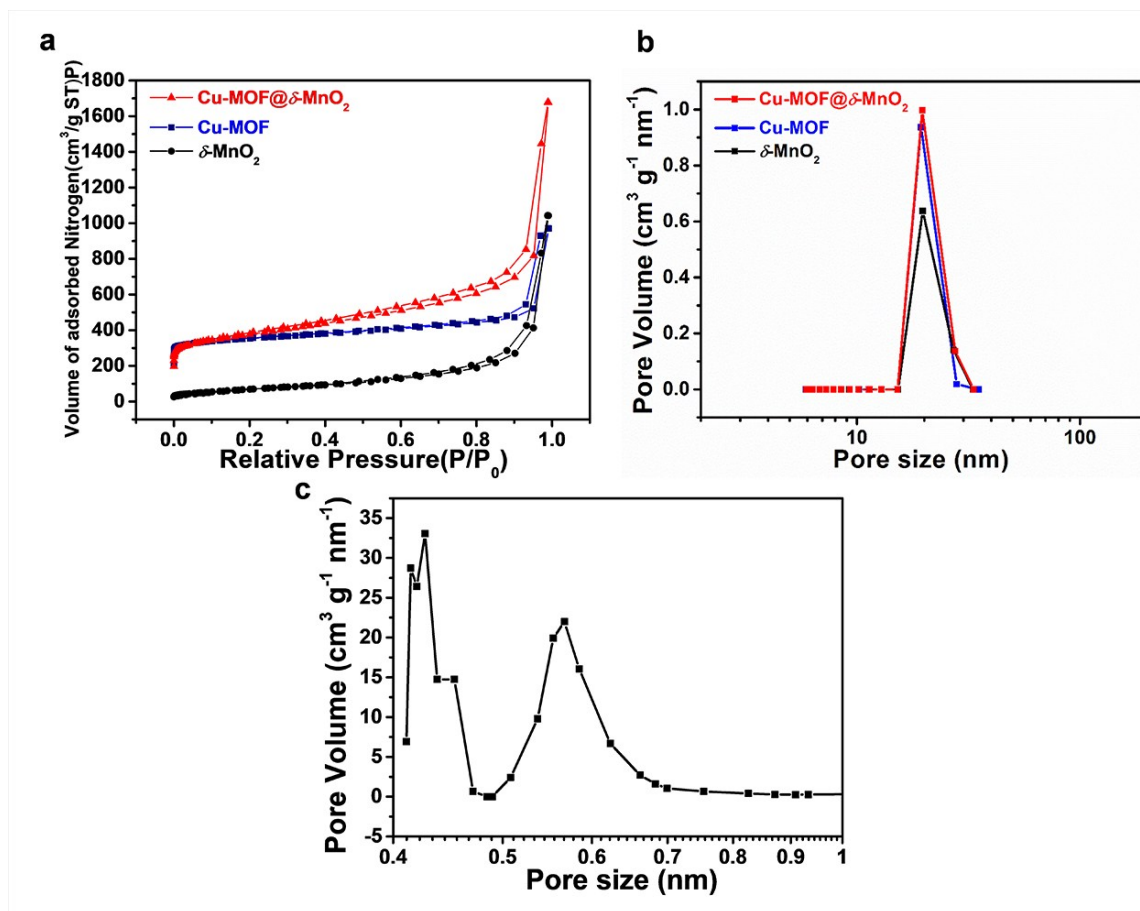

**Figure S3.** (a) Nitrogen adsorption-desorption isotherms, (b) pore size distribution curves of mesoporous for Cu-MOF@ $\delta$ -MnO<sub>2</sub>, Cu-MOF and  $\delta$ -MnO<sub>2</sub>, (c) pore size distribution curves of micropore for Cu-MOF@ $\delta$ -MnO<sub>2</sub>.

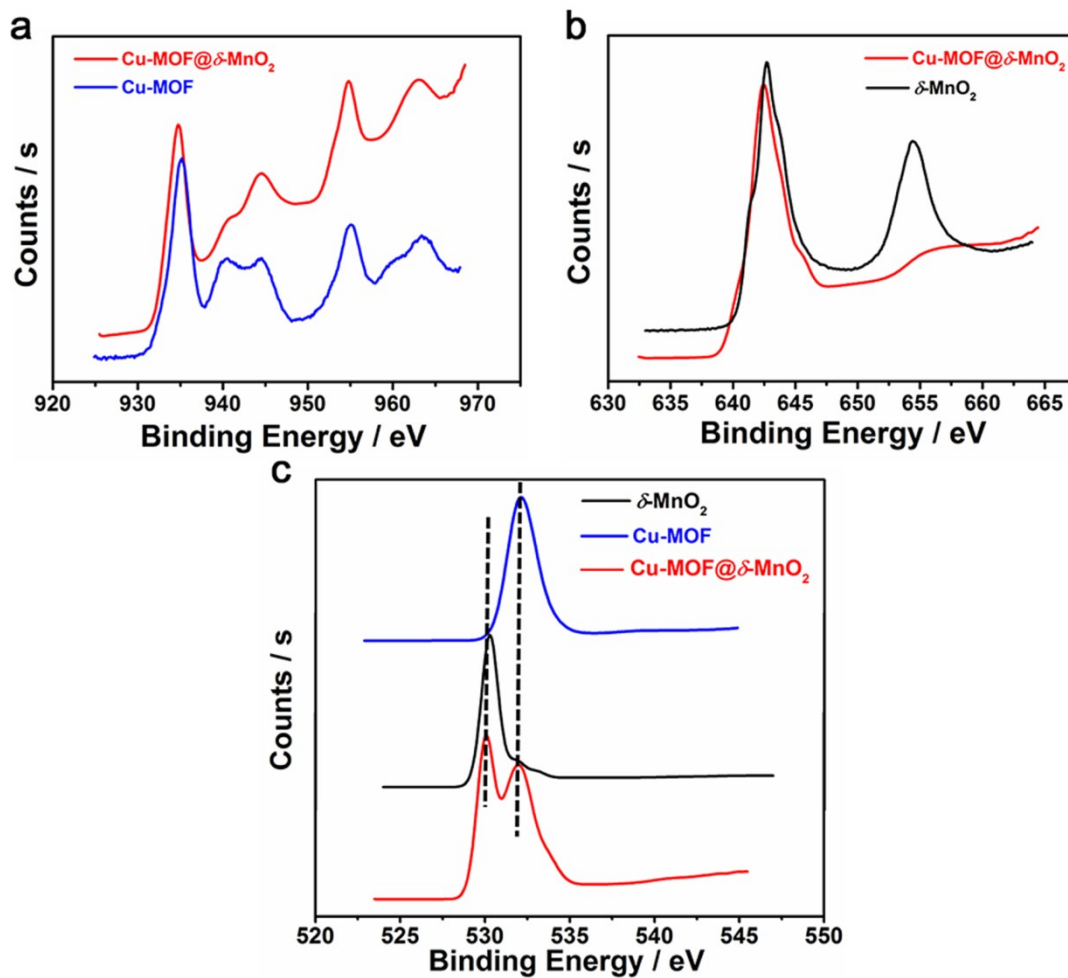

**Figure S4.** Comparisons of (a) Cu 2p, (b) Mn 2p and (c) O 1s XPS spectra of Cu-MOF,  $\delta$ -MnO<sub>2</sub> and Cu-MOF@ $\delta$ -MnO<sub>2</sub>.



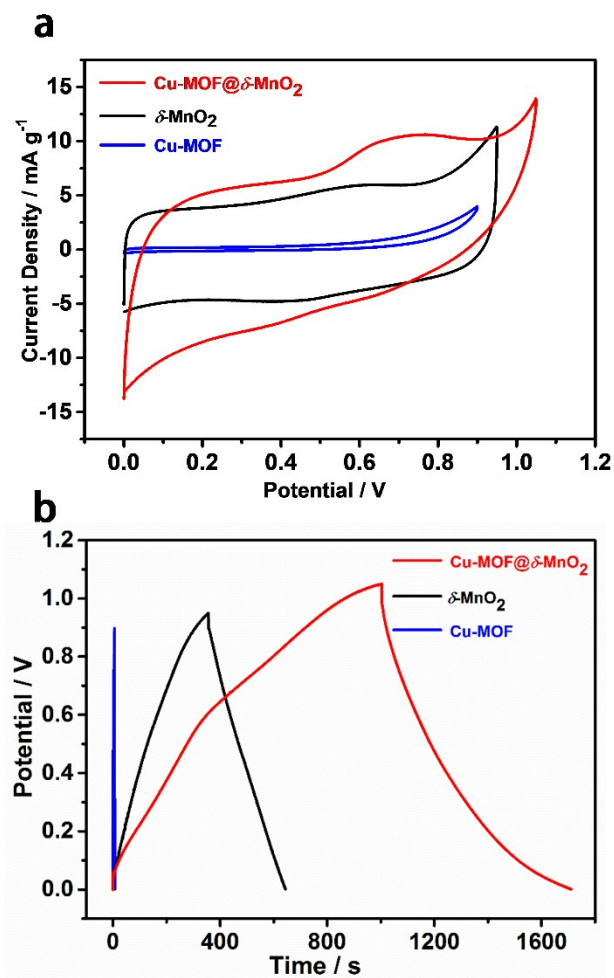

**Figure S5.** Comparison of Cu-MOF@ $\delta$ -MnO<sub>2</sub> ultrathin nanosheets, Cu-MOF nanoparticles and  $\delta$ -MnO<sub>2</sub> ultrathin nanosheets, (a) Cyclic voltammetry curves at different scan rates, (b) The galvanostatic charge-discharge curves at different current densities in 1.0 M Na<sub>2</sub>SO<sub>4</sub> electrolyte with a three-electrode system.

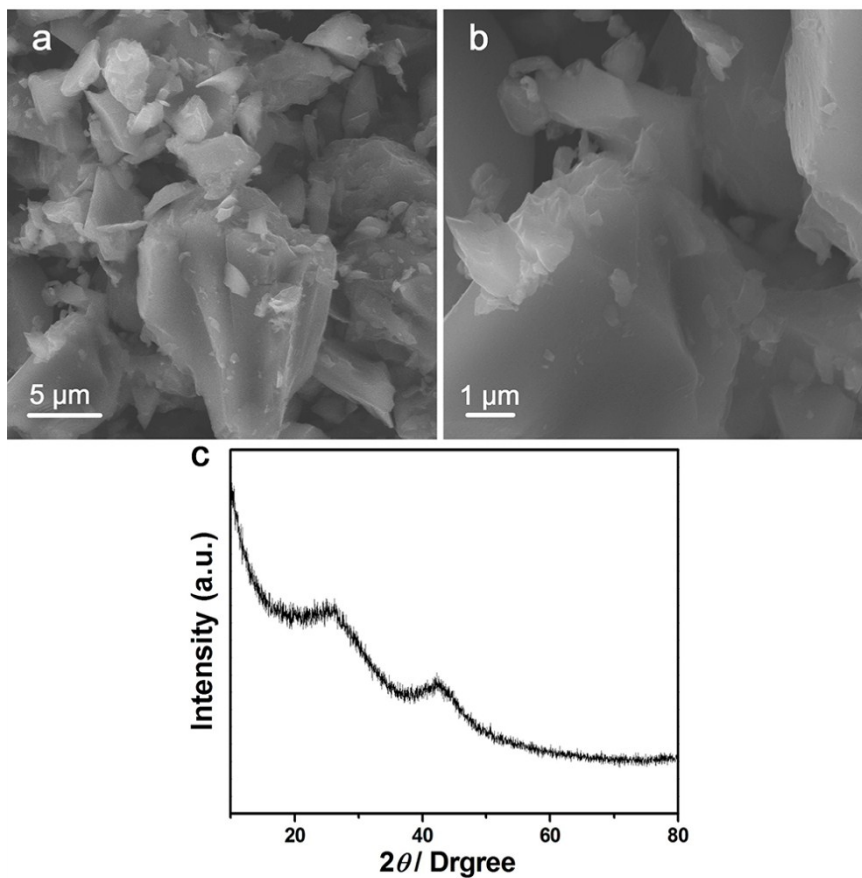

**Figure S6.** (a,b) Typical SEM images of activated carbon at different magnifications, (c) XRD pattern of activated carbon.

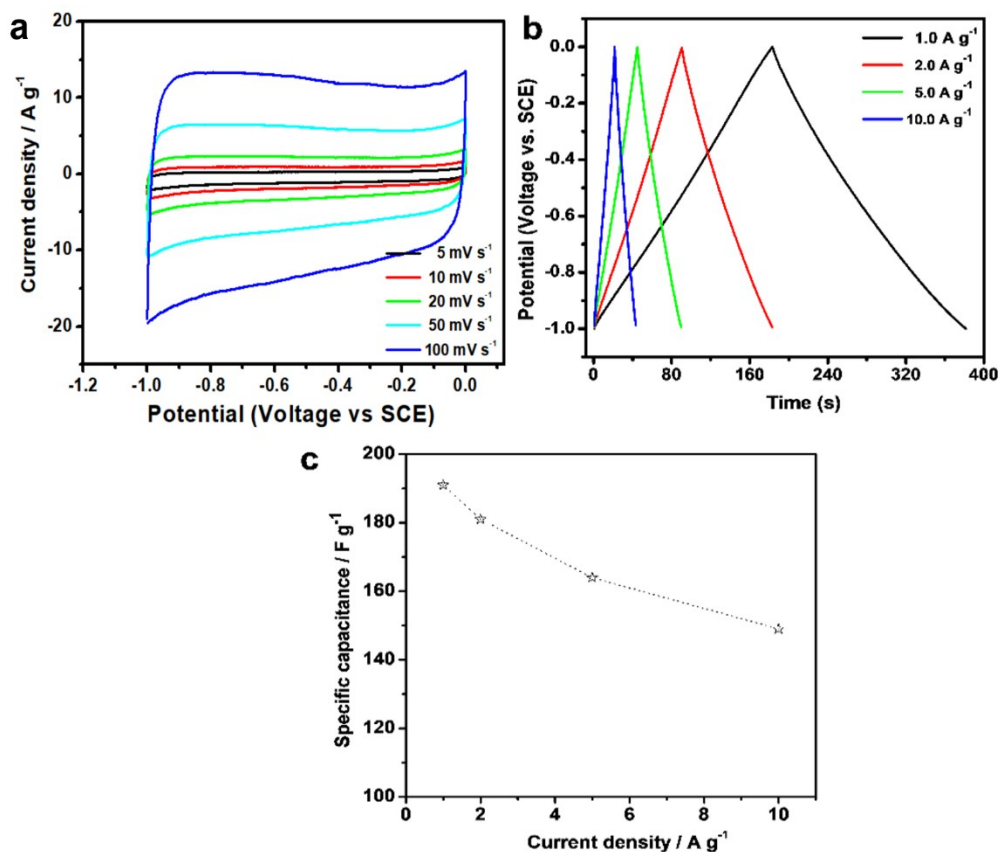

**Figure S7.** (a) Cyclic voltammetry curves of activated carbon electrode at different scan rates, (b) The galvanostatic charge-discharge curves of activated carbonelectrode at different current densities, (c) Specific capacitances of activated carbon electrode at different current densities in 1.0 M  $\text{Na}_2\text{SO}_4$  electrolyte with a three-electrode system.

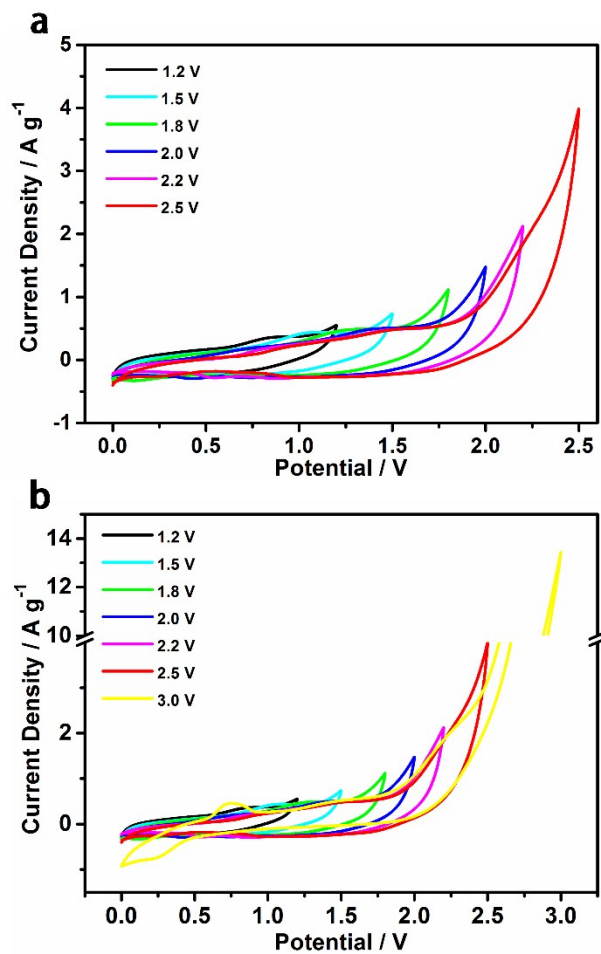

**Figure S8.** CV curves of the asymmetric supercapacitor under different potentials varying from 1.20-2.50 V (a), and 1.20-3.0 V (b) at 5 mV s<sup>-1</sup>.

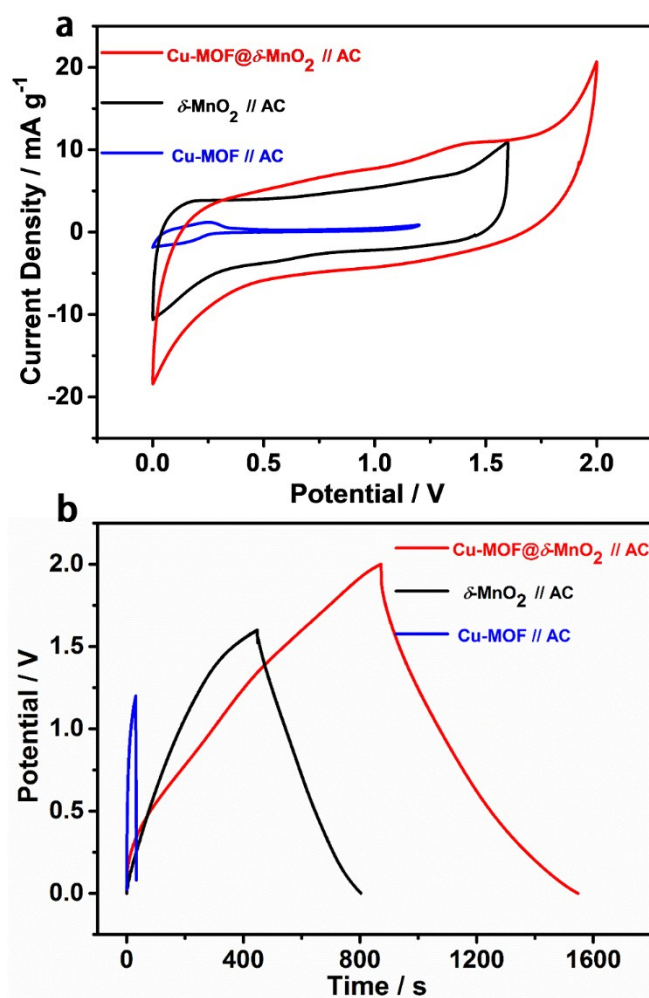

**Figure S9.** Comparison of Cu-MOF@ $\delta$ -MnO<sub>2</sub> ultrathin nanosheets, Cu-MOF nanoparticles and  $\delta$ -MnO<sub>2</sub> ultrathin nanosheets, (a) Cyclic voltammetry curves at different scan rates, and (b) The galvanostatic charge-discharge curves at different current densities in 1.0 M Na<sub>2</sub>SO<sub>4</sub> electrolyte with an ASC devices.

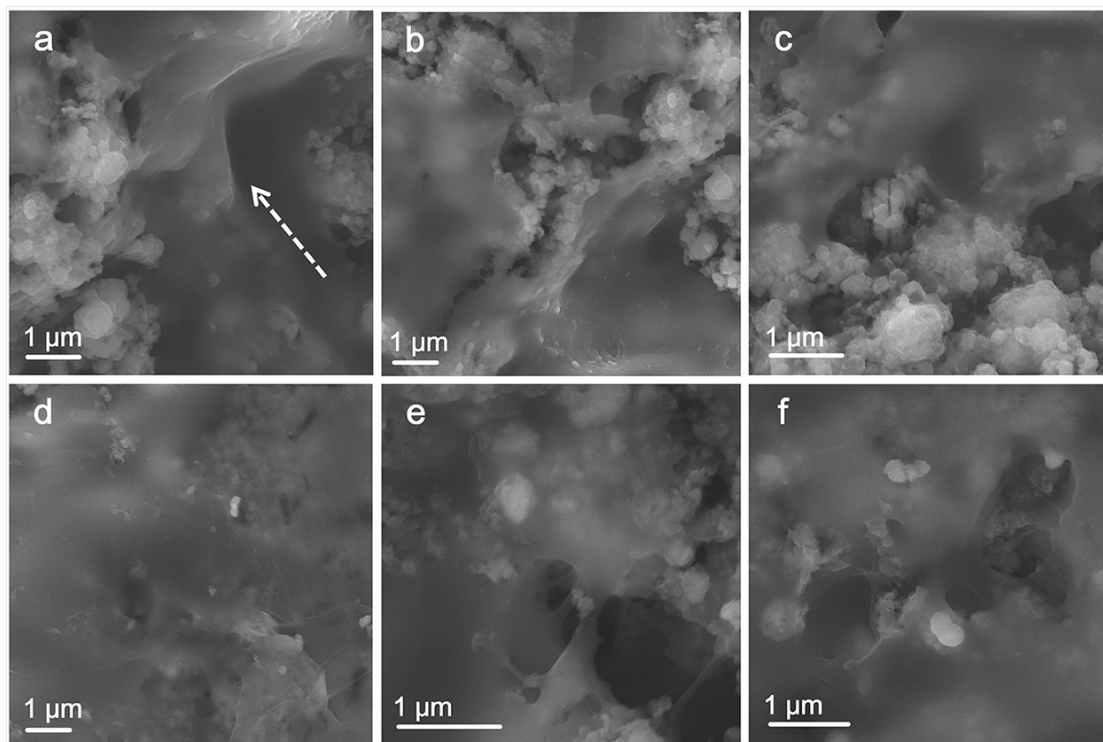

**Figure S10.** Typical SEM images of (a-c) Activated materials from the cycled composite electrode during the working process (0.5 cycle), and (d-f) Activated materials after the working process (1.0 cycle).

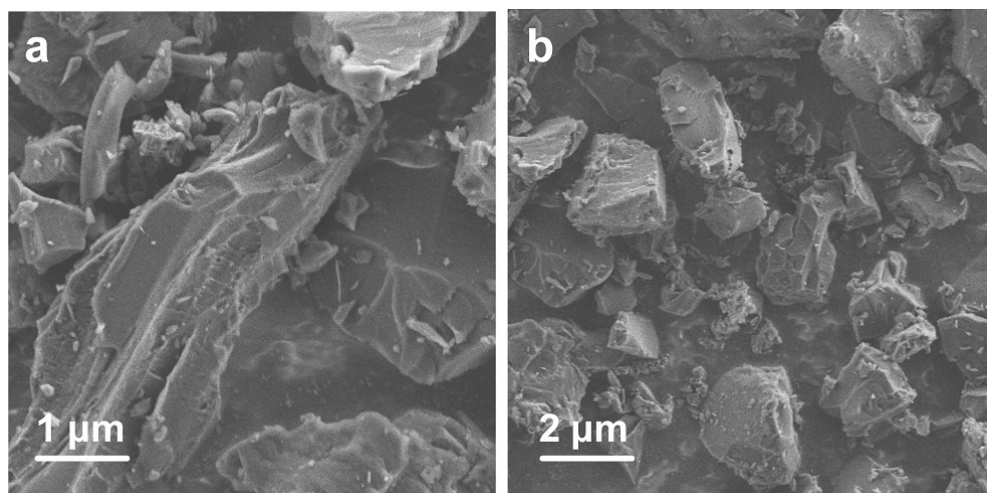

**Figure S11.** Typical SEM images of (a) Activated materials from the activated carbon electrode during the working process (0.5 cycle), and (b) after the working process (1.0 cycle).

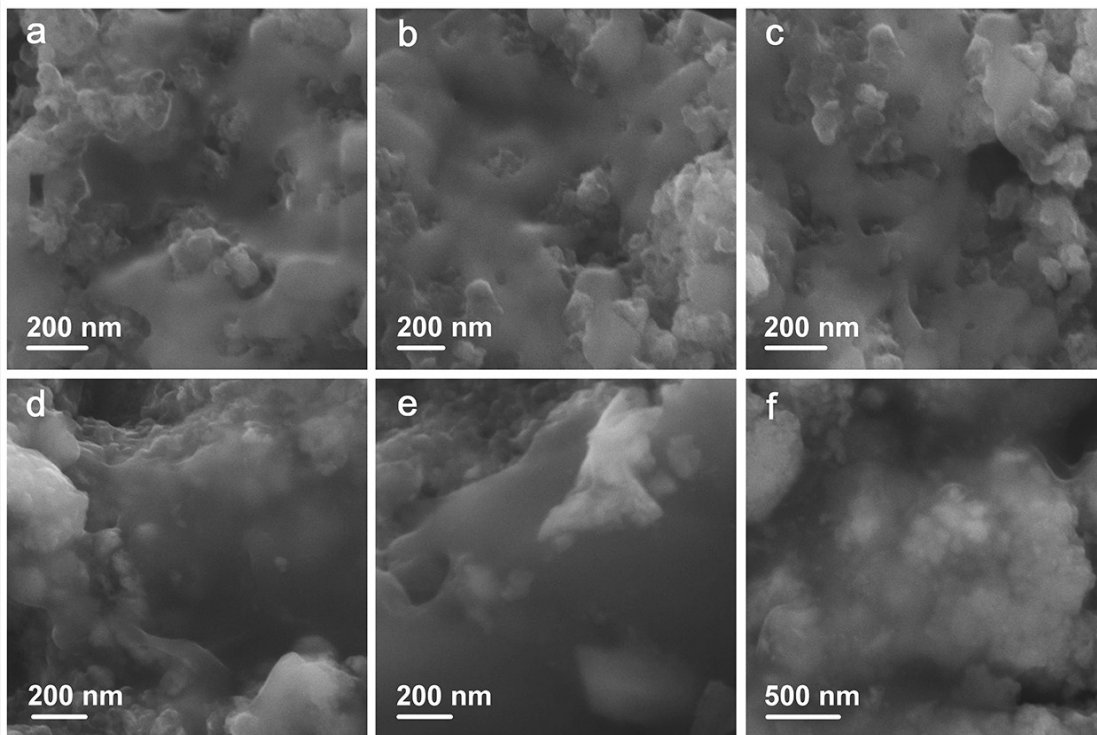

**Figure S12.** Typical SEM images of (a-c) Activated materials from the cycled composite electrode (without teflon) during the working process (0.5 cycle), and (d-f) Activated materials (without teflon) after the working process (1.0 cycle).



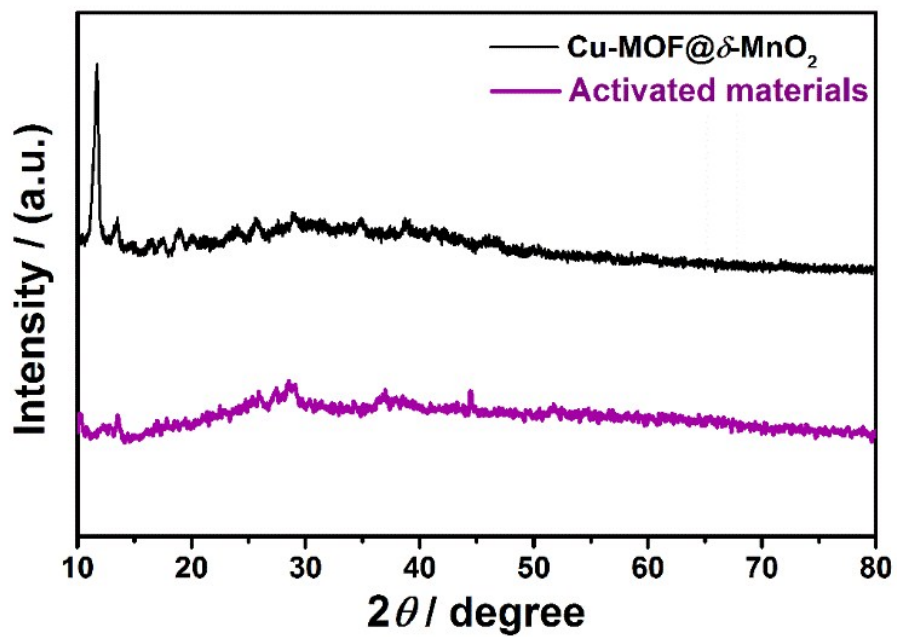

**Figure S13.** Comparison of XRD patterns of Cu-MOF@ $\delta$ -MnO<sub>2</sub> and activated materials obtained after 25 cycles.

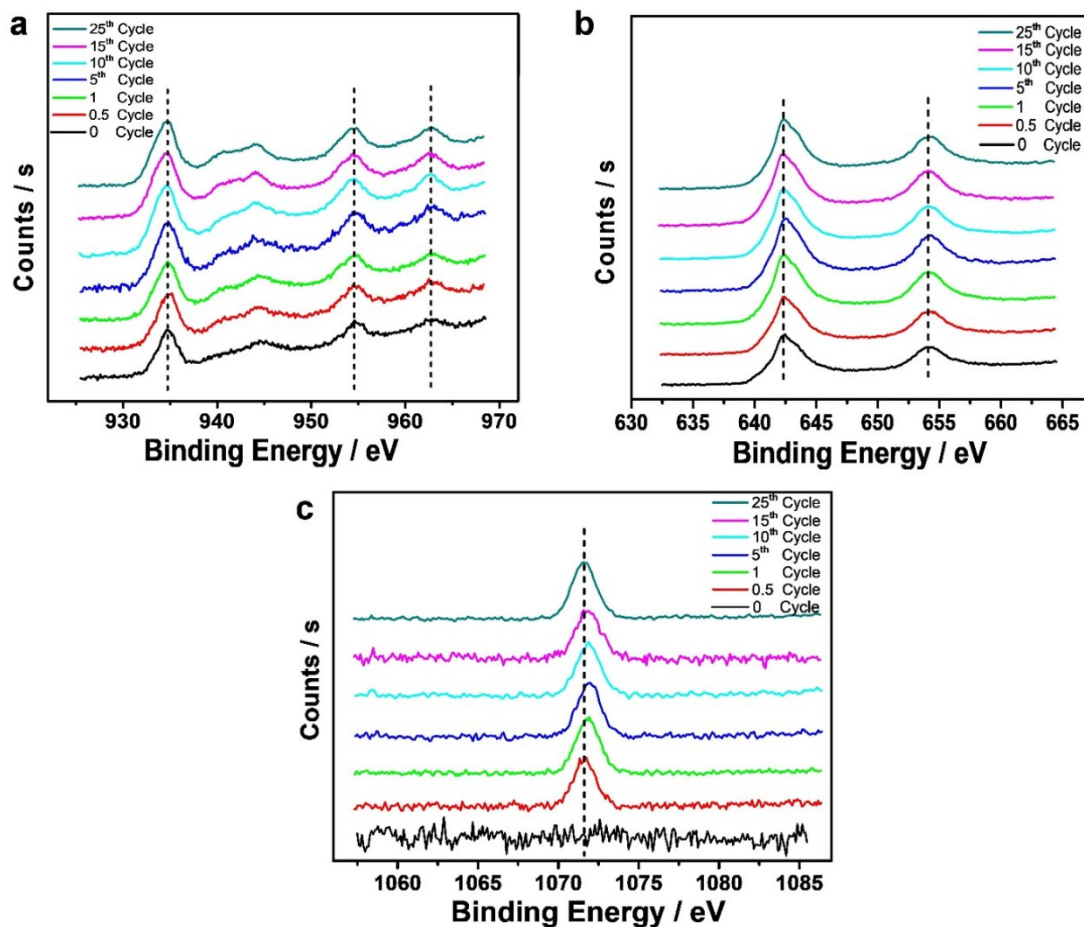

**Figure S14.** XPS spectra of the Cu-MOF@ $\delta$ -MnO<sub>2</sub> ultrathin nanosheet samples during the working process ( from 0 cycle to 25 the cycle), a) Cu 2p, b) Mn 2p and c) Na 1s.

**Table 1.** Comparisons with different MnO<sub>2</sub> based materials with a three-electrode system.

| Activated materials                                                    | Capacitance (F g <sup>-1</sup> ) | E <sub>max</sub> (Whkg <sup>-1</sup> ) | P <sub>max</sub> (W kg <sup>-1</sup> ) | CR (%) / CN                 | Ref |
|------------------------------------------------------------------------|----------------------------------|----------------------------------------|----------------------------------------|-----------------------------|-----|
| MnO <sub>2</sub> /GR gel/Ni foam                                       | 322/10 mV s <sup>-1</sup>        | -                                      | -                                      | 45.7/200 mV s <sup>-1</sup> | 1   |
| MnO <sub>2</sub> /Sb-doped SnO <sub>2</sub>                            | 216/0.5 A g <sup>-1</sup>        | 108                                    | 10625                                  | 91.5/5000                   | 2   |
| MnO <sub>2</sub> /carbon microtube                                     | 617.6/1 A g <sup>-1</sup>        | -                                      | -                                      | 80/1000                     | 3   |
| Diatomite/TiO <sub>2</sub> /MnO <sub>2</sub>                           | 425/0.2 A g <sup>-1</sup>        | -                                      | -                                      | 94.1/2000                   | 4   |
| MnO <sub>2</sub> /CeO <sub>2</sub>                                     | 274.3/0.5 A g <sup>-1</sup>      | -                                      | -                                      | 93.9/1000                   | 5   |
| Carbon nanotube/MnO <sub>2</sub>                                       | 145.6/5 mV s <sup>-1</sup>       | 15.06                                  | 1498.5                                 | 98/1500                     | 6   |
| MnO <sub>2</sub> /CNTs composite                                       | 149/0.2 A g <sup>-1</sup>        | -                                      | -                                      | 90/5000                     | 7   |
| NiMoO <sub>4</sub> /MnO <sub>2</sub>                                   | 976/1 A g <sup>-1</sup>          | -                                      | -                                      | 90.9/3000                   | 8   |
| MnO <sub>2</sub> /N-graphene                                           | 453/2 A g <sup>-1</sup>          | -                                      | -                                      | 114.4/4000                  | 9   |
| MnO <sub>2</sub> nanoparticles                                         | 280                              | -                                      | -                                      | 92.31/500                   | 10  |
| CoMoO <sub>4</sub> /MnO <sub>2</sub>                                   | 1800/1A g <sup>-1</sup>          | -                                      | -                                      | 96/30000                    | 11  |
| NiCo <sub>2</sub> S <sub>4</sub> @MnO <sub>2</sub>                     | 520.7/1 A g <sup>-1</sup>        | -                                      | -                                      | 86.8/2000                   | 12  |
| Nickel-doped MnO <sub>2</sub>                                          | 153.6/1 A g <sup>-1</sup>        | -                                      | -                                      | 103/1000                    | 13  |
| NiCo <sub>2</sub> O <sub>4</sub> /MnO <sub>2</sub>                     | 13.9 F cm <sup>-2</sup>          | -                                      | -                                      | 97.5/6000                   | 14  |
| Carbon nanofiber/MnO <sub>2</sub>                                      | 257/5 mV s <sup>-1</sup>         | -                                      | -                                      | 105/1000                    | 15  |
| MnO <sub>2</sub> /Ni <sub>0.75</sub> Co <sub>0.25</sub> O <sub>y</sub> | 476.8/0.5 A g <sup>-1</sup>      | -                                      | -                                      | 94.3/1000                   | 16  |
| MnO <sub>2</sub> /carbon                                               | 202/0.25 A g <sup>-1</sup>       | -                                      | -                                      | ~87/1000                    | 17  |
| MnO <sub>2</sub> /ZnO                                                  | 570.9 μF cm <sup>-2</sup>        | -                                      | -                                      | 91.8/2000                   | 18  |
| MnO <sub>2</sub>                                                       | 197.3/1 A g <sup>-1</sup>        | -                                      | -                                      | 94.6/1000                   | 19  |
| MnO <sub>2</sub> /PPy                                                  | 205/2 mV s <sup>-1</sup>         | -                                      | -                                      | 96.5/400                    | 20  |
| grapheme/ MnO <sub>2</sub>                                             | 319.8/0.2 A g <sup>-1</sup>      | 31.5                                   | 1000                                   | 95/10000                    | 21  |
| GR/MnO <sub>2</sub> nanotube                                           | 290.6/1 A g <sup>-1</sup>        | -                                      | -                                      | 90.7/3000                   | 22  |
| GR/MnO <sub>2</sub> nanoparticle                                       | 171.3/1 A g <sup>-1</sup>        | -                                      | -                                      | 89.7/3000                   | 22  |
| GR/polyaniline/MnO <sub>2</sub>                                        | 800.1/0.4 A g <sup>-1</sup>      | -                                      | -                                      | 71/800                      | 23  |
| CuO/MnO <sub>2</sub>                                                   | 228                              | -                                      | -                                      | 82.2/5000                   | 24  |
| This work                                                              | 667/1 A g <sup>-1</sup>          | -                                      | -                                      | 96.3/6000                   |     |

**Table 2.** Comparisons with other MnO<sub>2</sub> based materials with a two-electrode system.

| Activated materials                                                  | Capacitance (F g <sup>-1</sup> )                | E <sub>max</sub> (Wh kg <sup>-1</sup> ) | P <sub>max</sub> (W kg <sup>-1</sup> ) | CR(%)/CN   | Ref |
|----------------------------------------------------------------------|-------------------------------------------------|-----------------------------------------|----------------------------------------|------------|-----|
| MnO <sub>2</sub> /GR gel/Ni foam                                     | 0.89/10 mV s <sup>-1</sup>                      | 0.72 mWh cm <sup>-3</sup>               | -                                      | 98.6/10000 | 1   |
| CoMoO <sub>4</sub> /MnO <sub>2</sub>                                 | 152/1 A g <sup>-1</sup>                         | 54                                      | 8000                                   | 84/10000   | 11  |
| NiCo <sub>2</sub> O <sub>4</sub> /MnO <sub>2</sub>                   | 156.5/4 mA cm <sup>-2</sup>                     | 60.4                                    | 2400                                   | 88.2/10000 | 14  |
| //MoO <sub>3</sub> @PPy                                              |                                                 |                                         |                                        |            |     |
| MnO <sub>2</sub> /GR                                                 | 267                                             | 18.64                                   | 12600                                  | 92/7000    | 25  |
| MnO <sub>2</sub> //Active carbon                                     | 315/5 mv s <sup>-1</sup>                        | 24.7                                    | 3500                                   | 92/6000    | 26  |
| ε-MnO <sub>2</sub> /Ti <sub>3</sub> C <sub>2</sub> T <sub>x</sub> Ar | 212/1 A g <sup>-1</sup> .                       | 14.42                                   | 20000                                  | 88/10000   | 27  |
| MnO <sub>2</sub> /PANI/carbon                                        | 642/10 mV s <sup>-1</sup>                       | 39.9                                    | 642                                    | 88.1/1000  | 28  |
| MnO <sub>2</sub> /GR-carbon                                          | 83.3/20 mV s <sup>-1</sup>                      | 84.3                                    | 5720                                   | 92/10000   | 29  |
| Carbon/MnO <sub>2</sub> //N-carbon                                   | 78.2/1 A g <sup>-1</sup>                        | 34.7                                    | 26800                                  | 91.2/2000  | 30  |
| MnO <sub>2</sub> / carbon /GR                                        | 210/1 mA cm <sup>-2</sup>                       | 24                                      | 10000                                  | 95.7/1000  | 31  |
| Bi <sub>2</sub> O <sub>3</sub> /CNF//MnO <sub>2</sub> /CNF           | 25.2/1.5 mA cm <sup>-2</sup>                    | 11.3                                    | 3370                                   | ~85/4000   | 32  |
| MnO <sub>2</sub> /CNT//aerogel CNT                                   | 157.5 μF cm <sup>-1</sup> /50 mVs <sup>-1</sup> | 46.59 nWh cm <sup>-1</sup>              | 61.55 μW cm <sup>-1</sup>              | > 99/10000 | 33  |
| NPG@MnO <sub>2</sub> //CNTs/carbon                                   | 12 mF cm <sup>-2</sup>                          | 5.4 μWh cm <sup>-2</sup>                | 2531 μW cm <sup>-2</sup>               | 90/2000    | 34  |
| H-MnO <sub>2</sub> //RGO                                             | 449/0.75 mA cm <sup>-2</sup>                    | 0.25 mWh cm <sup>-3</sup>               | 1.44 Wcm <sup>-3</sup>                 | 99/10000   | 35  |
| MnO <sub>2</sub> -ERGO//CNT-ERGO                                     | 69.4/ 0.5 A g <sup>-1</sup>                     | 31.8                                    | 9188.1                                 | 84.4/10000 | 36  |
| H-TiO <sub>2</sub> @MnO <sub>2</sub> //H-TiO <sub>2</sub> @C         | 139.6/1.1 A g <sup>-1</sup>                     | 59                                      | 45000                                  | 91.2/5000  | 37  |
| GR/MnO <sub>2</sub> // GR/Ag                                         | 112.8/10 mV s <sup>-1</sup>                     | 50.8                                    | 90300                                  | -          | 38  |
| 3DG/CNTs/MnO <sub>2</sub>                                            | 343.1/ 2 mV s <sup>-1</sup>                     | 33.71                                   | 22727                                  | 95.3/1000  | 39  |
| Co <sub>3</sub> O <sub>4</sub> / MnO <sub>2</sub> // carbon          | 353/5 A g <sup>-1</sup>                         | ~9.8                                    | -                                      | 90.2/20000 | 40  |
| MnO <sub>2</sub> -PEDOT//AC ASC                                      | 503/1 mV s <sup>-1</sup>                        | 0.0018 Wh cm <sup>-3</sup>              | 0.38 W cm <sup>-3</sup>                | 99.5/4000  | 41  |
| MnO <sub>2</sub> /KCu <sub>7</sub> S <sub>4</sub>                    | 533/1 mV s <sup>-1</sup>                        | 12.3                                    | 2020                                   | 85/6000    | 42  |
| MnO <sub>2</sub> /NiO@Ni                                             | 218/3 A g <sup>-1</sup>                         | 59.5                                    | 25350                                  | 75/10000   | 43  |
| α-MnO <sub>2</sub> @ δ-MnO <sub>2</sub>                              | 276.9/1 A g <sup>-1</sup>                       | 78                                      | 21700                                  | 98.1/10000 | 44  |
| α-MnO <sub>2</sub> multiwalled carbon                                | 99.7/1 mV s <sup>-1</sup>                       | 26.3                                    | 29400                                  | 77/20000   | 45  |
| This work                                                            | 340/1 A g <sup>-1</sup>                         | 79.1                                    | 20650                                  | 95/6000    |     |

## References

- 1 T. Zhai, F. Wang, M. Yu, S. Xie, C. Liang, C. Li, F. Xiao, R. Tang, Q. Wu, X. Lu and Y. Tong, *Nanoscale*, 2013, **5**, 6790.
- 2 S. Park, H.-W. Shim, C. W. Lee, H. J. Song, I. J. Park, J.-C. Kim, K. S. Hong and D.-W. Kim, *Nano Res.*, 2015, **8**, 990–1004.
- 3 X. Zhang, X. Meng, S. Gong, P. Li, L. Jin and Q. Cao, *Mater. Lett.*, 2016, **179**, 73–77.
- 4 X. L. Guo, M. Kuang, F. Li, X. Y. Liu, Y. X. Zhang, F. Dong and D. Losic, *Electrochim. Acta*, 2016, **190**, 159–167.
- 5 H. Zhang, J. Gu, J. Tong, Y. Hu, B. Guan, B. Hu, J. Zhao and C. Wang, *Chem. Eng. J.*, 2016, **286**, 139–149.
- 6 D. Ganguly, D. Pahari, N. S. Das, P. Howli, B. Das, D. Banerjee and K. K. Chattopadhyay, *J. Electroanal. Chem.*, 2016, **778**, 12–22.
- 7 P. Wu, S. Cheng, L. Yang, Z. Lin, X. Gui, X. Ou, J. Zhou, M. Yao, M. Wang, Y. Zhu and M. Liu, *ACS Appl. Mater. Interfaces*, 2016, **8**, 23721–23728.
- 8 H. Chen, L. Yu, J. M. Zhang and C. P. Liu, *Ceram. Int.*, 2016, **42**, 18058–18063.
- 9 H. R. Naderi, P. Norouzi and M. R. Ganjali, *Appl. Surf. Sci.*, 2016, **366**, 552–560.
- 10 S. R. Srither, A. Karthik, S. Arunmetha, D. Murugesan and V. Rajendran, *Mater. Chem. Phys.*, 2016, **183**, 375–382.
- 11 J. Wang, S. Liu, X. Zhang, X. Liu, X. Liu, N. Li, J. Zhao and Y. Li, *Electrochim. Acta*, 2016, **213**, 663–671.
- 12 H. Chen, X. L. Liu, J. M. Zhang, F. Dong and Y. X. Zhang, *Ceram. Int.*, 2016, **42**, 8909–8914.
- 13 Y. Yang, T. Liu, L. Zhang, S. Zhao, W. Zeng, S. Hussain, C. Deng, H. Pan and X. Peng, *J. Mater. Sci. Mater. Electron.*, 2016, **27**, 6202–6207.
- 14 S.-W. Zhang, B.-S. Yin, C. Liu, Z.-B. Wang and D.-M. Gu, *Chem. Eng. J.*, 2016, **312**, 296–305.
- 15 F. N. I. Sari, H.-M. Lin and J.-M. Ting, *Thin Solid Films*, 2016, **620**, 54–63.
- 16 N. Zhang, Y. Ding, J. Zhang, B. Fu, X. Zhang, X. Zheng and Y. Fang, *J. Alloys Compd.*, 2017, **694**, 1302–1308.
- 17 J. Lv, X. Yang, H. Zhou, L. Kang, Z. Lei and Z. H. Liu, *Mater. Res. Bull.*, 2016, **73**, 429–436.
- 18 X. Zhou and L. Ma, *Thin Solid Films*, 2015, **597**, 44–49.
- 19 S. Zhao, T. Liu, D. Hou, W. Zeng, B. Miao, S. Hussain, X. Peng and M. S. Javed, *Appl. Surf. Sci.*, 2015, **356**, 259–265.
- 20 L. Yuan, C. Wan and L. Zhao, *Int. J. Electrochem. Sci.*, 2015, **10**, 9456–9465.
- 21 J. Hao, Y. Zhong, Y. Liao, D. Shu, Z. Kang, X. Zou, C. He and S. Guo, *Electrochim. Acta*, 2015, **167**, 412–420.

- 22 C. Wang, F. Li, Y. Wang, H. Qu, X. Yi, Y. Lu, Y. Qiu, Z. Zou, B. Yu and Y. Luo, *J. Alloys Compd.*, 2015, **634**, 12–18.
- 23 K. Li, D. Guo, J. Chen, Y. Kong and H. Xue, *Synth. Met.*, 2015, **209**, 555–560.
- 24 Z. Zhang, C. Ma, M. Huang, F. Li, S. Zhu, C. Hua, L. Yu, H. Zheng, X. Hu and Y. Zhang, *J. Mater. Sci. Mater. Electron.*, 2015, **26**, 4212–4220.
- 25 L. Peng, X. Peng, B. Liu, C. Wu, Y. Xie and G. Yu, *Nano Lett.*, 2013, **13**, 2151–2157.
- 26 G. Wang, H. Xu, L. Lu, H. Zhao, Y. Tian and W. An, *J. Appl. Electrochem.*, 2016, **46**, 1091–1097.
- 27 R. B. Rakhi, B. Ahmed, D. Anjum and H. N. Alshareef, *ACS Appl. Mater. Interfaces*, 2016, **8**, 18806–18814.
- 28 Y. He, S. Du, H. Li, Q. Cheng, V. Pavlinek and P. Saha, *J. Solid State Electrochem.*, 2016, **20**, 1459–1467.
- 29 X. Ma, P. Kolla, Y. Zhao, A. L. Smirnova and H. Fong, *J. Power Sources*, 2016, **325**, 541–548.
- 30 Y. Luan, Y. Huang, L. Wang, M. Li, R. Wang and B. Jiang, *J. Electroanal. Chem.*, 2016, **763**, 90–96.
- 31 D. G. Lee and B. H. Kim, *Synth. Met.*, 2016, **219**, 115–123.
- 32 H. Xu, X. Hu, H. Yang, Y. Sun, C. Hu and Y. Huang, *Adv. Energy Mater.*, 2015, **5**, 1401882.
- 33 P. Xu, B. Wei, Z. Cao, J. Zheng, K. Gong, F. Li, J. Yu, Q. Li, W. Lu, J.-H. Byun, B.-S. Kim, Y. Yan and T.-W. Chou, *ACS Nano*, 2015, **9**, 6088–6096.
- 34 H. Xu, X. Hu, Y. Sun, H. Yang, X. Liu and Y. Huang, *Nano Res.*, 2015, **8**, 1148–1158.
- 35 T. Zhai, S. Xie, M. Yu, P. Fang, C. Liang, X. Lu and Y. Tong, *Nano Energy*, 2014, **8**, 255–263.
- 36 Z. Zhang, F. Xiao, L. Qian, J. Xiao, S. Wang and Y. Liu, *Adv. Energy Mater.*, 2014, **4**, 1400064.
- 37 X. Lu, M. Yu, G. Wang, T. Zhai, S. Xie, Y. Ling, Y. Tong and Y. Li, *Adv. Mater.*, 2013, **25**, 267–272.
- 38 Y. Shao, H. Wang, Q. Zhang and Y. Li, *J. Mater. Chem. C*, 2013, **1**, 1245–1251.
- 39 W. Chen, Y. He, X. Li, J. Zhou, Z. Zhang, C. Zhao, C. Gong, S. Li, X. Pan and E. Xie, *Nanoscale*, 2013, **5**, 11733.
- 40 X. Xia, D. Chao, Z. Fan, C. Guan, X. Cao, H. Zhang and H. J. Fan, *Nano Lett.*, 2014, **14**, 1651–1658.
- 41 Z. Su, C. Yang, C. Xu, H. Wu, Z. Zhang, T. Liu, C. Zhang, Q. Yang, B. Li and F. Kang, *J. Mater. Chem. A*, 2013, **1**, 12432.
- 42 S. Dai, Y. Xi, C. Hu, X. Yue, L. Cheng and G. Wang, *J. Power Sources*, 2015, **274**, 477–482.
- 43 S. Saha, S. Chhetri, P. Khanra, P. Samanta, H. Koo, N. C. Murmu and T. Kuila, *J. Energy Storage*, 2016, **6**, 22–31.

- 44 Z. Ma, G. Shao, Y. Fan, G. Wang, J. Song and D. Shen, *ACS Appl. Mater. Interfaces*, 2016, **8**, 9050–9058.
- 45 R. T. Vinny, K. Chaitra, K. Venkatesh, N. Nagaraju and N. Kathyayini, *J. Power Sources*, 2016, **309**, 212–220.
